# Supplementary material for: Mucins and Truncated O-Glycans Unveil Phenotypic Discrepancies between Serous Ovarian Cancer Cell Lines and Primary Tumours
Source: MDPI journal article supplement (doi:10.3390/ijms19072045), 2018-07-13
Supplement: s1 [file s1]

# Supplementary: Mucins and Truncated O-Glycans Unveil Phenotypic Discrepancies between Serous Ovarian Cancer Cell Lines and Primary Tumours

**Ricardo Coelho** <sup>1,2,3</sup>, **Lara Marcos-Silva** <sup>1,2,4,5</sup>, **Nuno Mendes** <sup>1,2</sup>, **Daniela Pereira** <sup>1,2,†</sup>, **Catarina Brito** <sup>4,5</sup>, **Francis Jacob** <sup>6</sup>, **Catharina Steentoft** <sup>7</sup>, **Ulla Mandel** <sup>7</sup>, **Henrik Clausen** <sup>7</sup>, **Leonor David** <sup>1,2,3</sup>  
**and Sara Ricardo** <sup>1,2,3,\*</sup>

<sup>1</sup> Instituto de Investigação e Inovação em Saúde (i3S), Universidade do Porto, 4099-002 Porto, Portugal; rjcoelho@ipatimup.pt (R.C.); laras@ipatimup.pt (L.M.-S.); nmendes@ipatimup.pt (N.M.); [danismpereira@gmail.com](mailto:danismpereira@gmail.com) (D.P.)<sup>†</sup>; ldavid@ipatimup.pt (L.D.)

<sup>2</sup> Institute of Molecular Pathology and Immunology of the University of Porto (IPATIMUP), 4099-002 Porto, Portugal

<sup>3</sup> Faculty of Medicine, University of Porto, 4099-002 Porto, Portugal

<sup>4</sup> Instituto de Biologia Experimental e Tecnológica (iBET), 2780-901 Oeiras, Portugal; anabrito@ibet.pt

<sup>5</sup> Instituto de Tecnologia Química e Biológica (ITQB) António Xavier, Universidade Nova de Lisboa, 2780-157 Oeiras, Portugal

<sup>6</sup> Glyco-Oncology, Ovarian Cancer Research, Department of Biomedicine, University Hospital Basel and University of Basel, 4031 Basel, Switzerland; francis.jacob@unibas.ch

<sup>7</sup> Copenhagen Center for Glycomics, Department of Odontology, Faculty of Health Sciences, University of Copenhagen, Copenhagen, DK-2200, Denmark; steentoft@sund.ku.dk (C.S.); ulma@sund.ku.dk (U.M.); hclau@sund.ku.dk (H.C.)

\* Correspondence: sricardo@ipatimup.pt; Tel.: +351-22-040-8800

<sup>†</sup> Present work address: Portsmouth Hospitals NHS Trust, United Kingdom

**Table S1.** Information on ovarian cancer cell lines retrieved from ExPASy, a Bioinformatics Resource portal (<https://www.expasy.org>).

| Cell Line     |                  | Clinico-pathological Data           |     |                                                                                             |                                                           | References                             |                                                                                                         |
|---------------|------------------|-------------------------------------|-----|---------------------------------------------------------------------------------------------|-----------------------------------------------------------|----------------------------------------|---------------------------------------------------------------------------------------------------------|
| Name          | Category         | Origin                              | Age | Diagnosis                                                                                   | Treatment (before generation of cell line)                | 1                                      | 2                                                                                                       |
| <b>OVCAR3</b> | Cancer Cell line | Ovarian cancer (Ascites)            | 60Y | High grade ovarian serous adenocarcinoma                                                    | Chemotherapy (Cyclophosphamide, Adriamycin and cisplatin) | Cancer Res. 43(11):5379-89 (1983)      | <a href="https://web.expasy.org/cellosaurus/CVCL_0465">https://web.expasy.org/cellosaurus/CVCL_0465</a> |
| <b>OVCAR4</b> | Cancer Cell line | Ovarian cancer (Ascites)            | NA  | High grade ovarian serous adenocarcinoma                                                    | Chemotherapy (Cyclophosphamide, Adriamycin and cisplatin) | Semin. Oncol. 11(3):285-298(1984)      | <a href="https://web.expasy.org/cellosaurus/CVCL_1627">https://web.expasy.org/cellosaurus/CVCL_1627</a> |
| <b>OVCAR5</b> | Cancer Cell line | Ovarian cancer (Ascites)            | NA  | High grade ovarian serous adenocarcinoma                                                    | Untreated patient                                         | J. Clin. Invest. 76:1261-1267(1985)    | <a href="https://web.expasy.org/cellosaurus/CVCL_1628">https://web.expasy.org/cellosaurus/CVCL_1628</a> |
| <b>OVCAR8</b> | Cancer Cell line | Ovarian adenocarcinoma              | NA  | High grade ovarian serous adenocarcinoma                                                    | Chemotherapy (Carboplatin)                                | Int. J. Cancer 45:416-422(1990)        | <a href="https://web.expasy.org/cellosaurus/CVCL_1629">https://web.expasy.org/cellosaurus/CVCL_1629</a> |
| <b>SKOV3</b>  | Cancer Cell line | Ovarian cancer (Ascites)            | 63Y | Ovarian serous cystadenocarcinoma                                                           | ThioTEPA                                                  | J. Natl. Cancer Inst. 59:221-226(1977) | <a href="https://web.expasy.org/cellosaurus/CVCL_0532">https://web.expasy.org/cellosaurus/CVCL_0532</a> |
| <b>OAW42</b>  | Cancer Cell line | Ovarian cancer (Ascites)            | 46Y | Ovarian cystadenocarcinoma                                                                  | Chemotherapy (Cisplatin)                                  | J. Natl Cancer Inst., 72, 513 (1984)   | <a href="https://web.expasy.org/cellosaurus/CVCL_1615">https://web.expasy.org/cellosaurus/CVCL_1615</a> |
| <b>BG1</b>    | Cancer Cell line | Ovarian Adenocarcinoma              | NA  | Ovarian adenocarcinoma                                                                      | Not available                                             | Cancer 63:280-288(1989)                | <a href="https://web.expasy.org/cellosaurus/CVCL_6570">https://web.expasy.org/cellosaurus/CVCL_6570</a> |
| <b>EFO27</b>  | Cancer Cell line | Ovarian cancer (Omentum metastasis) | 36Y | Serous papillary denocarcinoma <sup>1</sup><br>Ovarian mucinous adenocarcinoma <sup>2</sup> | Not available                                             | J. Natl. Cancer Inst. 70:839-845(1983) | <a href="https://web.expasy.org/cellosaurus/CVCL_1192">https://web.expasy.org/cellosaurus/CVCL_1192</a> |
